# Supplementary material for: Role of arginine, a component of aqueous garlic extract, in remediation of sodium arsenite induced toxicity in A375 cells
Source: Royal Society of Chemistry journal article supplement (doi:10.1039/c3tx50098e), 2014-01-01
Supplement: c3tx50098e.pdf [file c3tx50098e.pdf]

**Role of the arginine, a component of aqueous garlic extract in remediation of sodium  
arsenite induced toxicity in A375 cell.**

**Running Title:** amelioration of arsenic toxicity by arginine

**Bornita Das, Samir Mandal and Keya Chaudhuri\***

Molecular and Human Genetics Division, CSIR-Indian Institute of Chemical Biology, Kolkata  
700032, India.

\*Corresponding author:

Dr. Keya Chaudhuri

Chief Scientist

Molecular and Human Genetics Division

CSIR-Indian Institute of Chemical Biology

4, Raja S.C.Mullick Road, Kolkata-700 032, India.

Tel: 91-33-2499-5762; Fax: 91-33-2473-5197

Email: [keya.chaudhuri@gmail.com](mailto:keya.chaudhuri@gmail.com), [kchaudhuri@iicb.res.in](mailto:kchaudhuri@iicb.res.in)

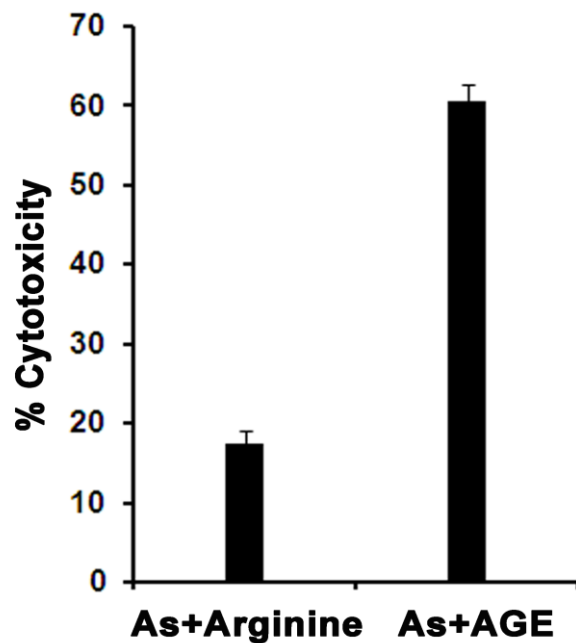

Supply fig 1. Comparative study of the protective effect of arginine with equivalent dose of AGE against NaAsO<sub>2</sub> induced cytotoxicity in A375 cells. The cells were treated with 10 μM NaAsO<sub>2</sub> for 24hr and concomitantly supplemented with 0.01mg/ml (60 μM equivalent) AGE or 0.01 mg/ml arginine. Cell growth inhibition was measured by MTT assay. Data are the mean ± SD from three replicate measurements.
